# Supplementary material for: Resolving brain regions using nanostructure initiator mass spectrometry imaging of phospholipids
Source: Royal Society of Chemistry journal article supplement (doi:10.1039/c2ib20043k), 2012-01-01
Supplement: c2ib20043k_3.pdf [file c2ib20043k_3.pdf]

| M/z    | Component 1 | Component 2 | Component 3 | Component 4 | Component 5 | Component 6 |
|--------|-------------|-------------|-------------|-------------|-------------|-------------|
| 769.66 | 0.1134      | 0.2015      | 0.516       | 0           | 0           | 0           |
| 770.65 | 0.0823      | 0.3805      | 0.3493      | 0           | 0           | 0           |
| 772.65 | 0.061       | 0.4647      | 0.2364      | 0.0232      | 0.0127      | 0           |
| 798.67 | 0.112       | 0.3747      | 0.3334      | 0.0306      | 0           | 0.0717      |
| 800.67 | 0.1273      | 0.3615      | 0.2864      | 0.0554      | 0           | 0.0519      |
| 820.63 | 0.251       | 0.15        | 0.2066      | 0.1386      | 0           | 0.6322      |
| 822.63 | 0.3101      | 0.0356      | 0.1709      | 0.2484      | 0.0475      | 0.5126      |
| 824.61 | 0.1216      | 0.2781      | 0           | 0.4066      | 0.3582      | 0           |
| 826.65 | 0.1553      | 0.1942      | 0.1517      | 0.2127      | 0.4116      | 0.2496      |
| 844.62 | 0.3591      | 0.2216      | 0.0459      | 0           | 0.0833      | 0.0064      |
| 846.62 | 0.3258      | 0.24        | 0.0249      | 0           | 0.109       | 0.0071      |
| 848.68 | 0.1357      | 0.2795      | 0.1216      | 0           | 0.2854      | 0.3784      |
| 850.64 | 0.1702      | 0.046       | 0.0597      | 0.2622      | 0.5293      | 0.2915      |
| 851.62 | 0.1416      | 0           | 0.1313      | 0.3678      | 0.5652      | 0.1969      |
| 852.63 | 0.332       | 0           | 0.2195      | 0.4064      | 0           | 0.0148      |
| 868.61 | 0.3508      | 0           | 0.2169      | 0.4214      | 0           | 0.0159      |
| 870.61 | 0.3276      | 0           | 0.202       | 0.384       | 0           | 0           |
| 872.65 | 0.3266      | 0.0426      | 0.3056      | 0.0989      | 0           | 0           |

**Table S1.** Six component breakdown from NMF analysis of 18 potassium adducts of phospholipids. Values are normalized to the sum of the total ion chromatogram.

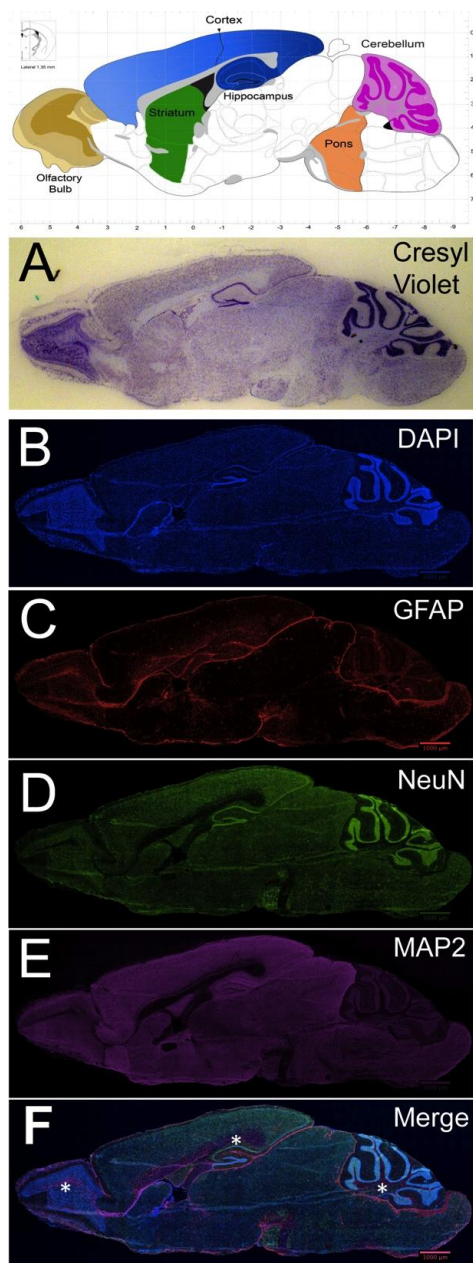

**Figure S1. Imaging of Whole Brain:** Fresh-frozen sections (5  $\mu\text{m}$ ) from fresh brain were collected on glass slides, and stained for histology to highlight specific cell features, highlighted in the graphic. Cresyl violet (Nissl) staining reveals regions of nuclear density (**A**). Slides were immunostained either with specific antibodies or with chemical stains to visualize cell type and their patterning in the brain: DAPI staining indicates the nuclei of glial or neurons (blue) (**B**); glial projections are visualized using, GFAP-Cy3 (red) (**C**); neuronal nuclei are visualized using NeuN-Alexa 488 (green) (**D**); neuronal projections are visualized using MAP2-Alexa 644 (purple) (**E**). Composite image in which all stains are overlaid to define neuron rich and glial rich areas of the brain (**F**). Neuron dense regions in the cerebellum, hippocampus and olfactory bulb (\*) are easily identified as regions with well defined structures (**A-F**). Scale bar indicates 500  $\mu\text{m}$ .

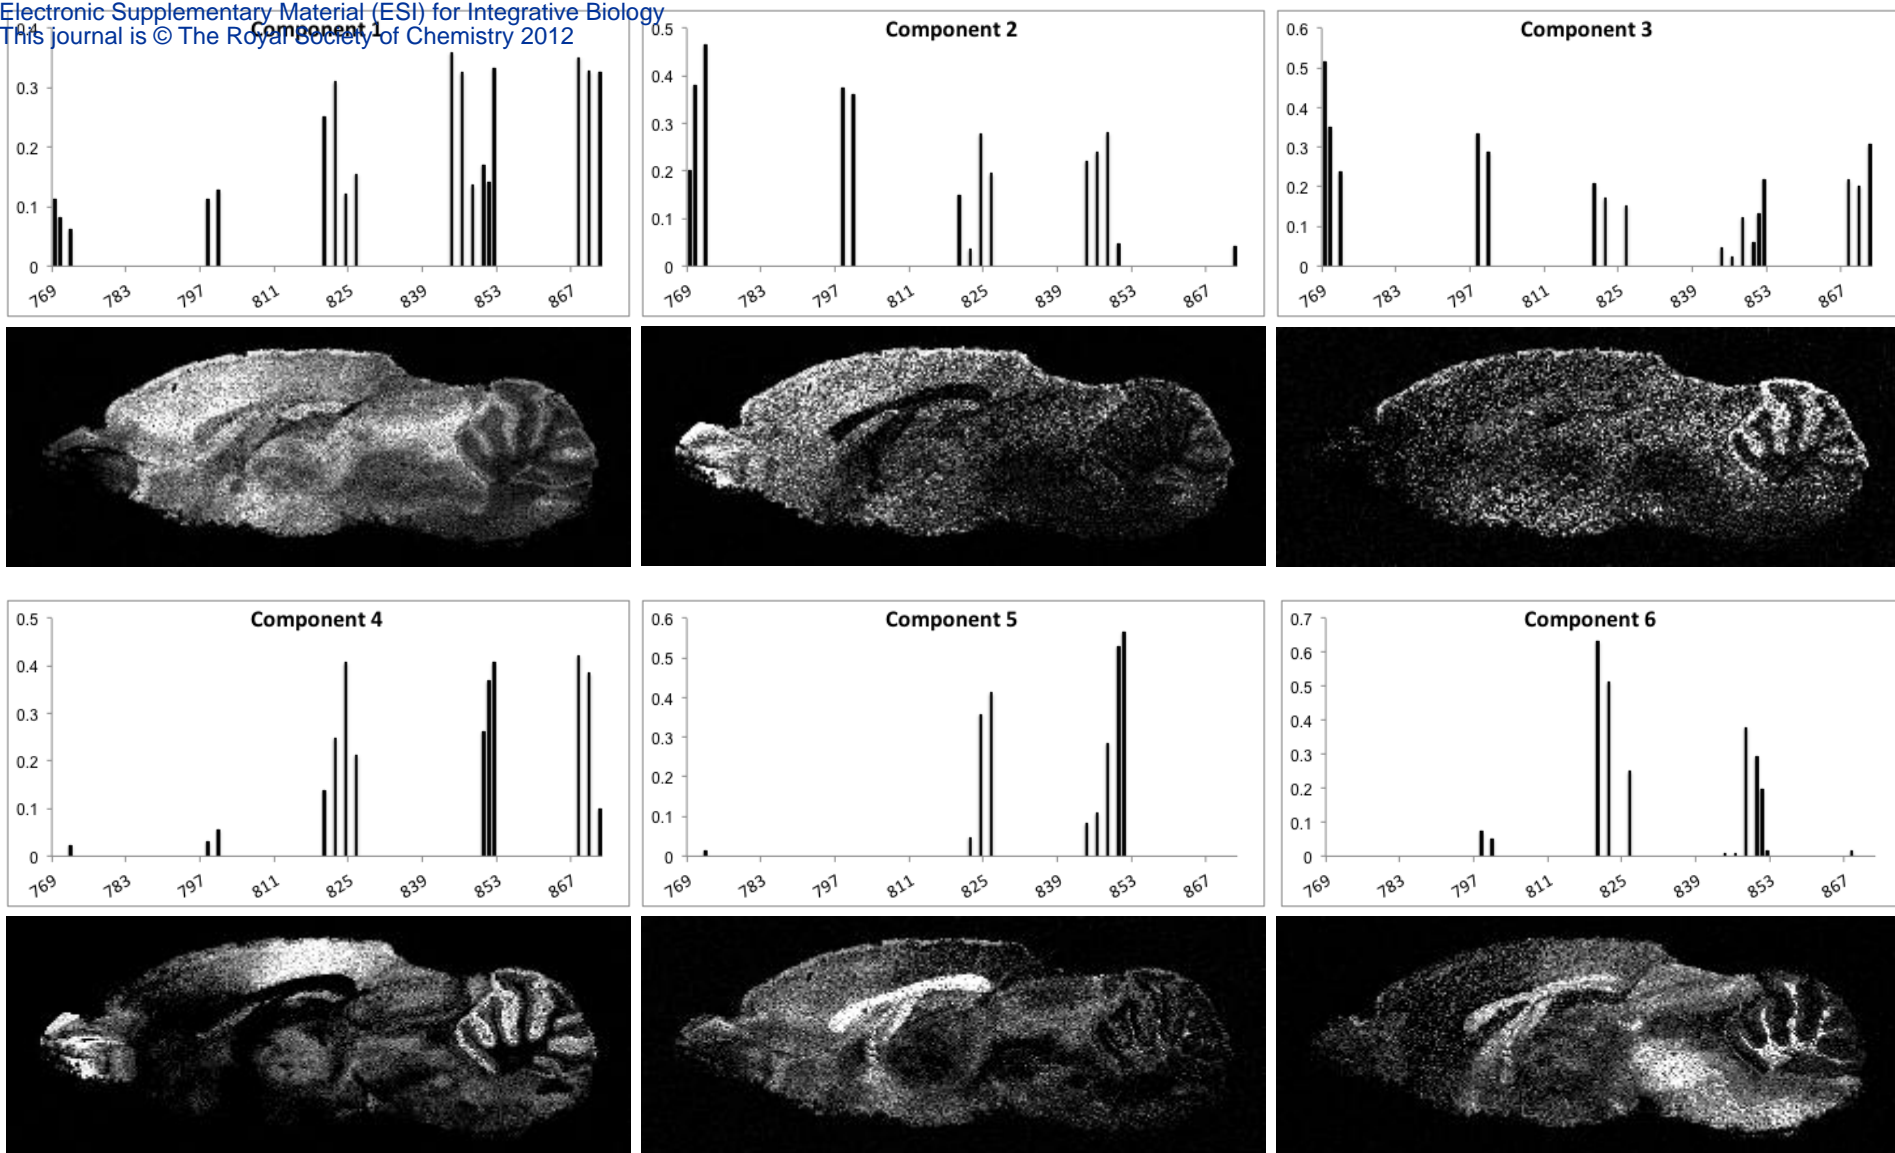

**Figure S2.** Six component breakdown from NMF analysis of 18 potassium adducts of phospholipids. Component 1 –Neuronal, exhibits a slight neuronal localization to frontal cortex, striatum and midbrain; Component 2 –Ubiquitous, possibly exhibits a slight neuronal localization to the olfactory bulb and frontal cortex; Component 3 –Ubiquitous, possibly exhibits slight localization to the cerebellar folds; Component 4 – Neuronal-rich, expressed intensely in the cerebellar fissures (external cerebellar folds), dorsal cortex, olfactory bulb; Component 5 – Glial-rich, expressed intensely in the corpus callosum and fimbria; Component 6 – Glial-rich, expressed intensely in the cerebellar arbor (internal cerebellar folds), pons, and the corpus callosum/fimbria.

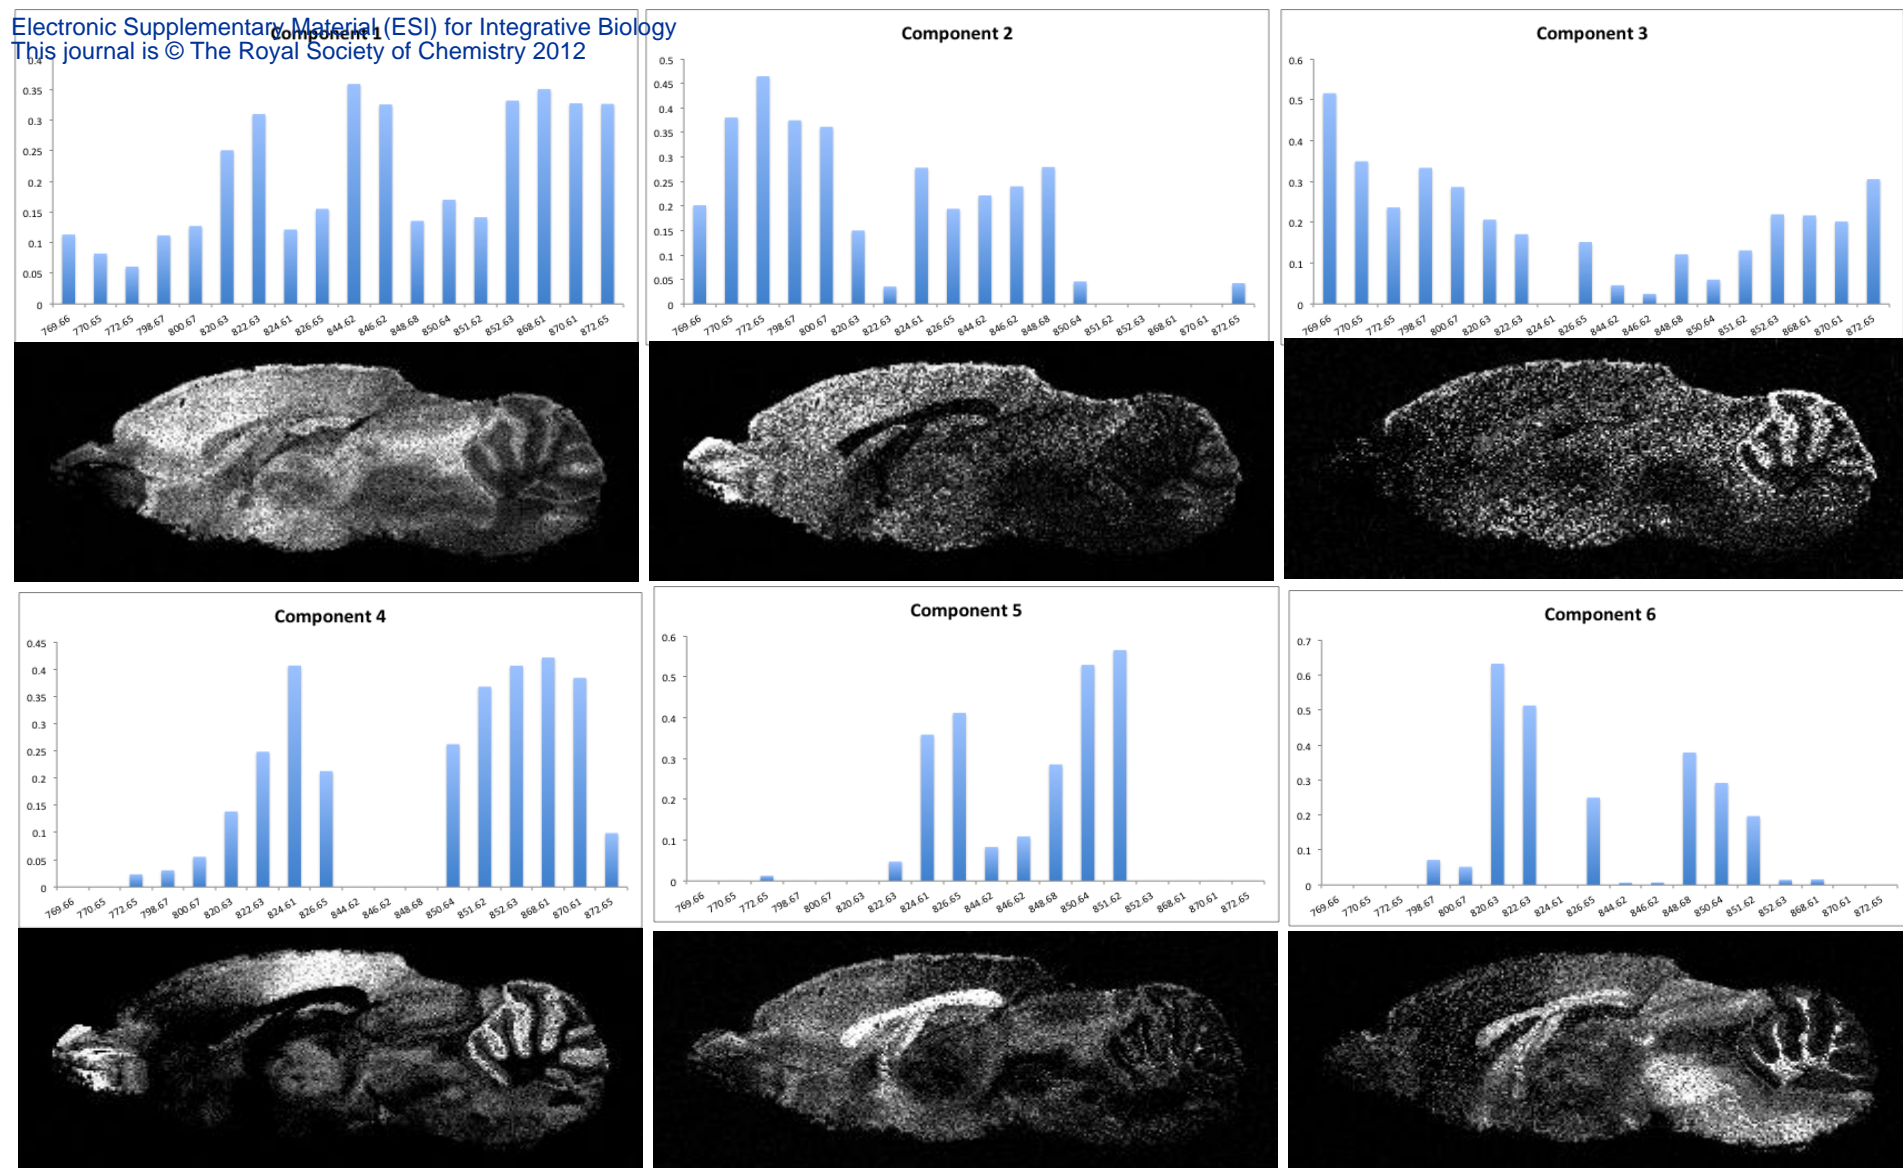

**Figure S2.** Six component breakdown from NMF analysis of 18 potassium adducts of phospholipids. Component 1 –Neuronal, exhibits a slight neuronal localization to frontal cortex, striatum and midbrain; Component 2 –Ubiquitous, possibly exhibits a slight neuronal localization to the olfactory bulb and frontal cortex; Component 3 –Ubiquitous, possibly exhibits slight localization to the cerebellar folds; Component 4 – Neuronal-rich, expressed intensely in the cerebellar fissures (external cerebellar folds), dorsal cortex, olfactory bulb; Component 5 – Glial-rich, expressed intensely in the corpus callosum and fimbria; Component 6 – Glial-rich, expressed intensely in the cerebellar arbor (internal cerebellar folds), pons, and the corpus callosum/fimbria.



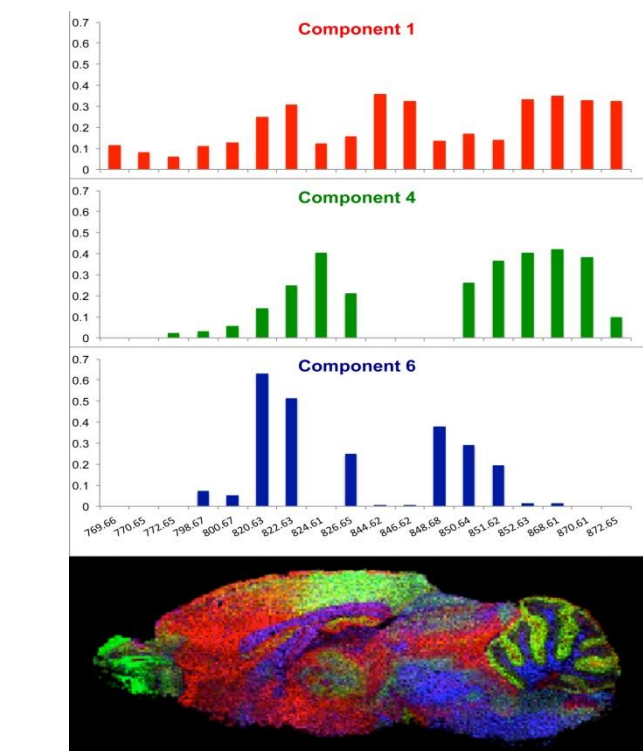

**Figure S3.** NMF Imaging yields a visualization of 3 components, out of 6 available components. When overlaid, components 1 (in red), 4 (in green), and 6 (in blue) yield a multiplicative image with region-specific component combinations.
