# Supplementary figures and images for: Resolving brain regions using nanostructure initiator mass spectrometry imaging of phospholipids
Source: Royal Society of Chemistry journal article supplement (doi:10.1039/c2ib20043k), 2012-01-01

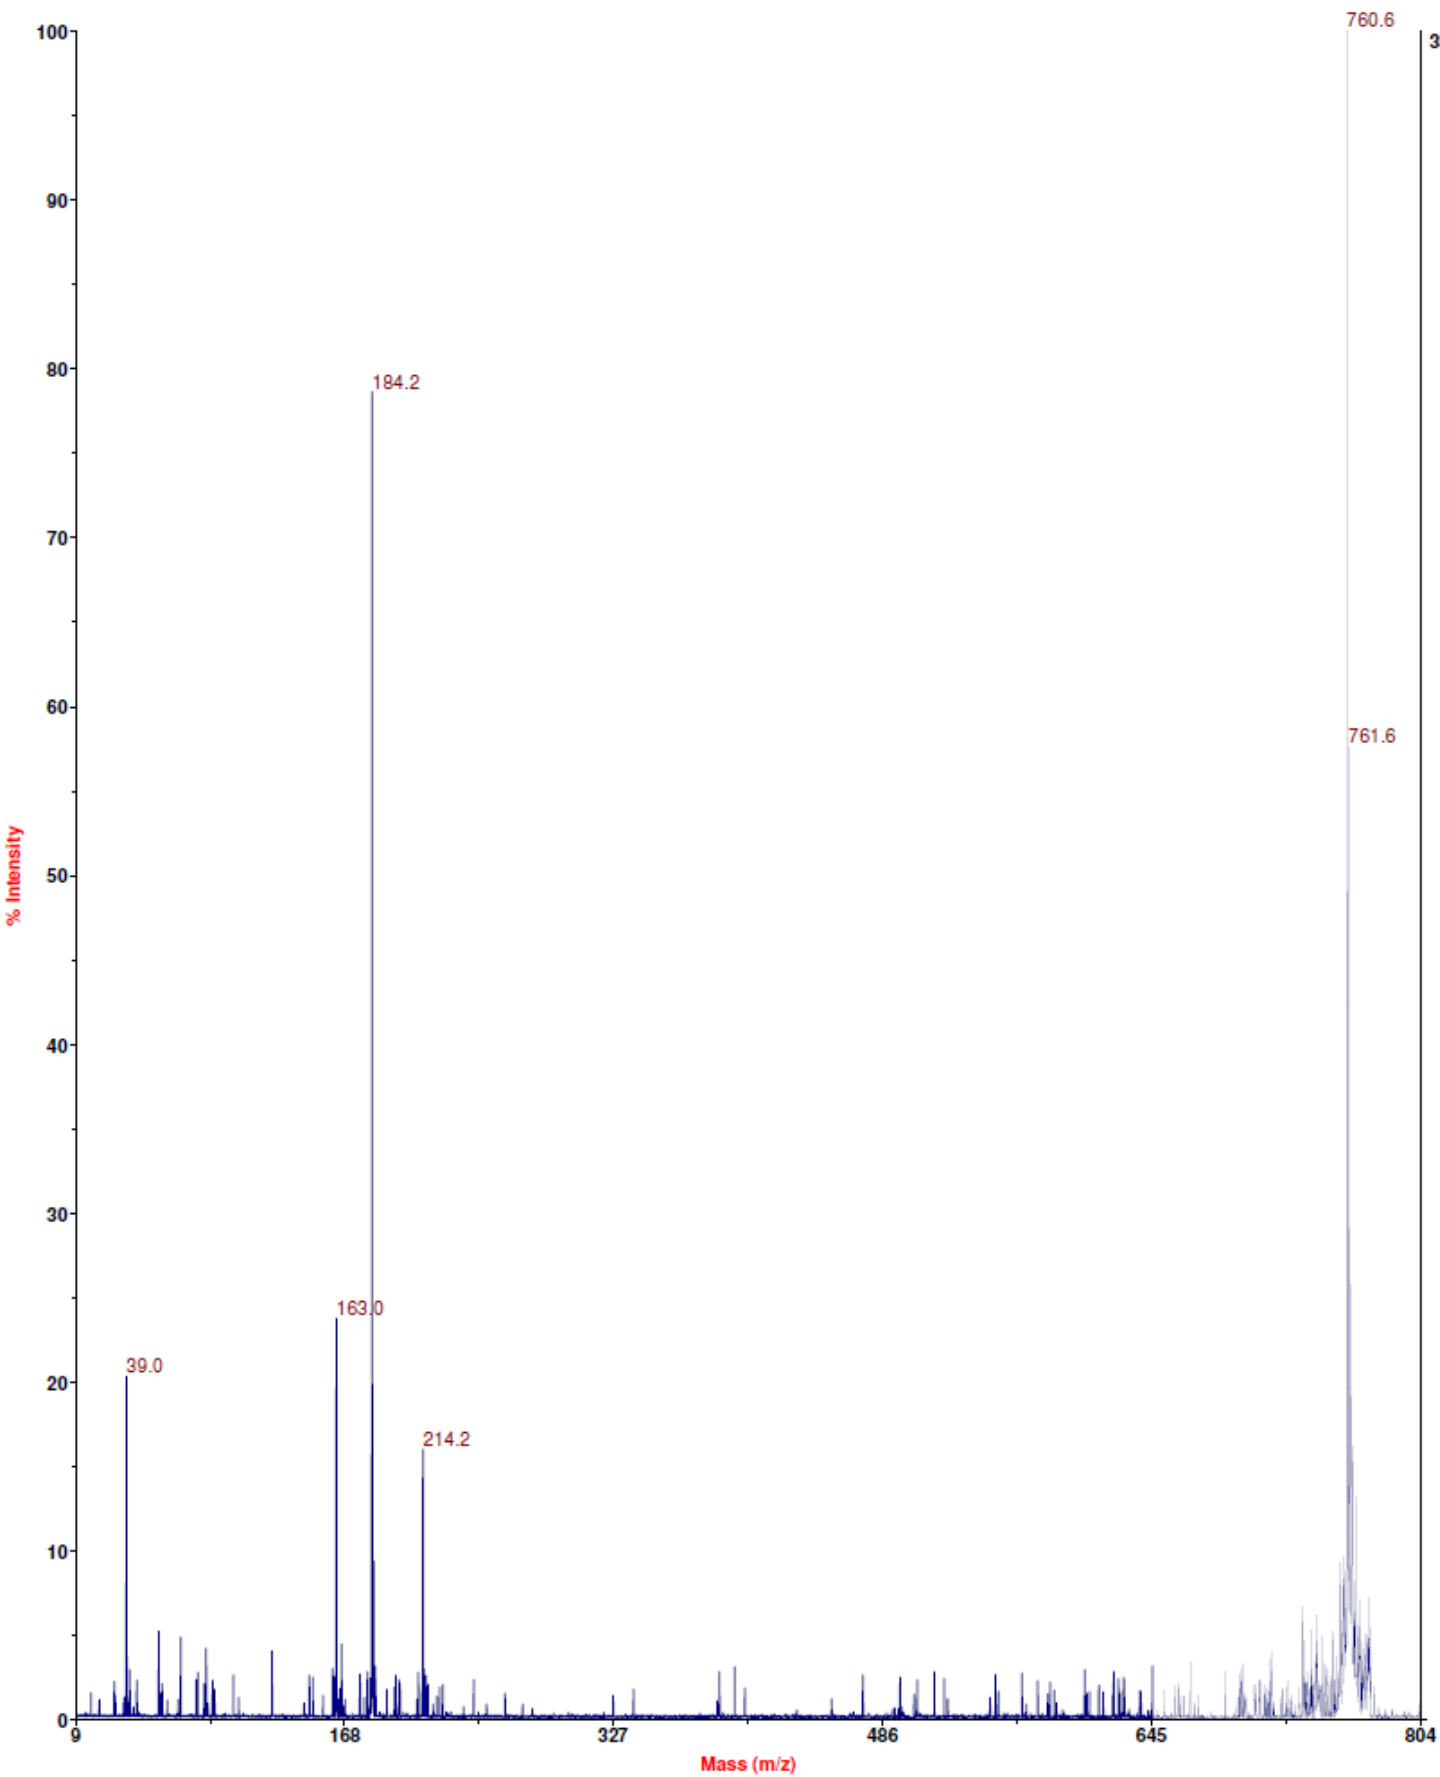

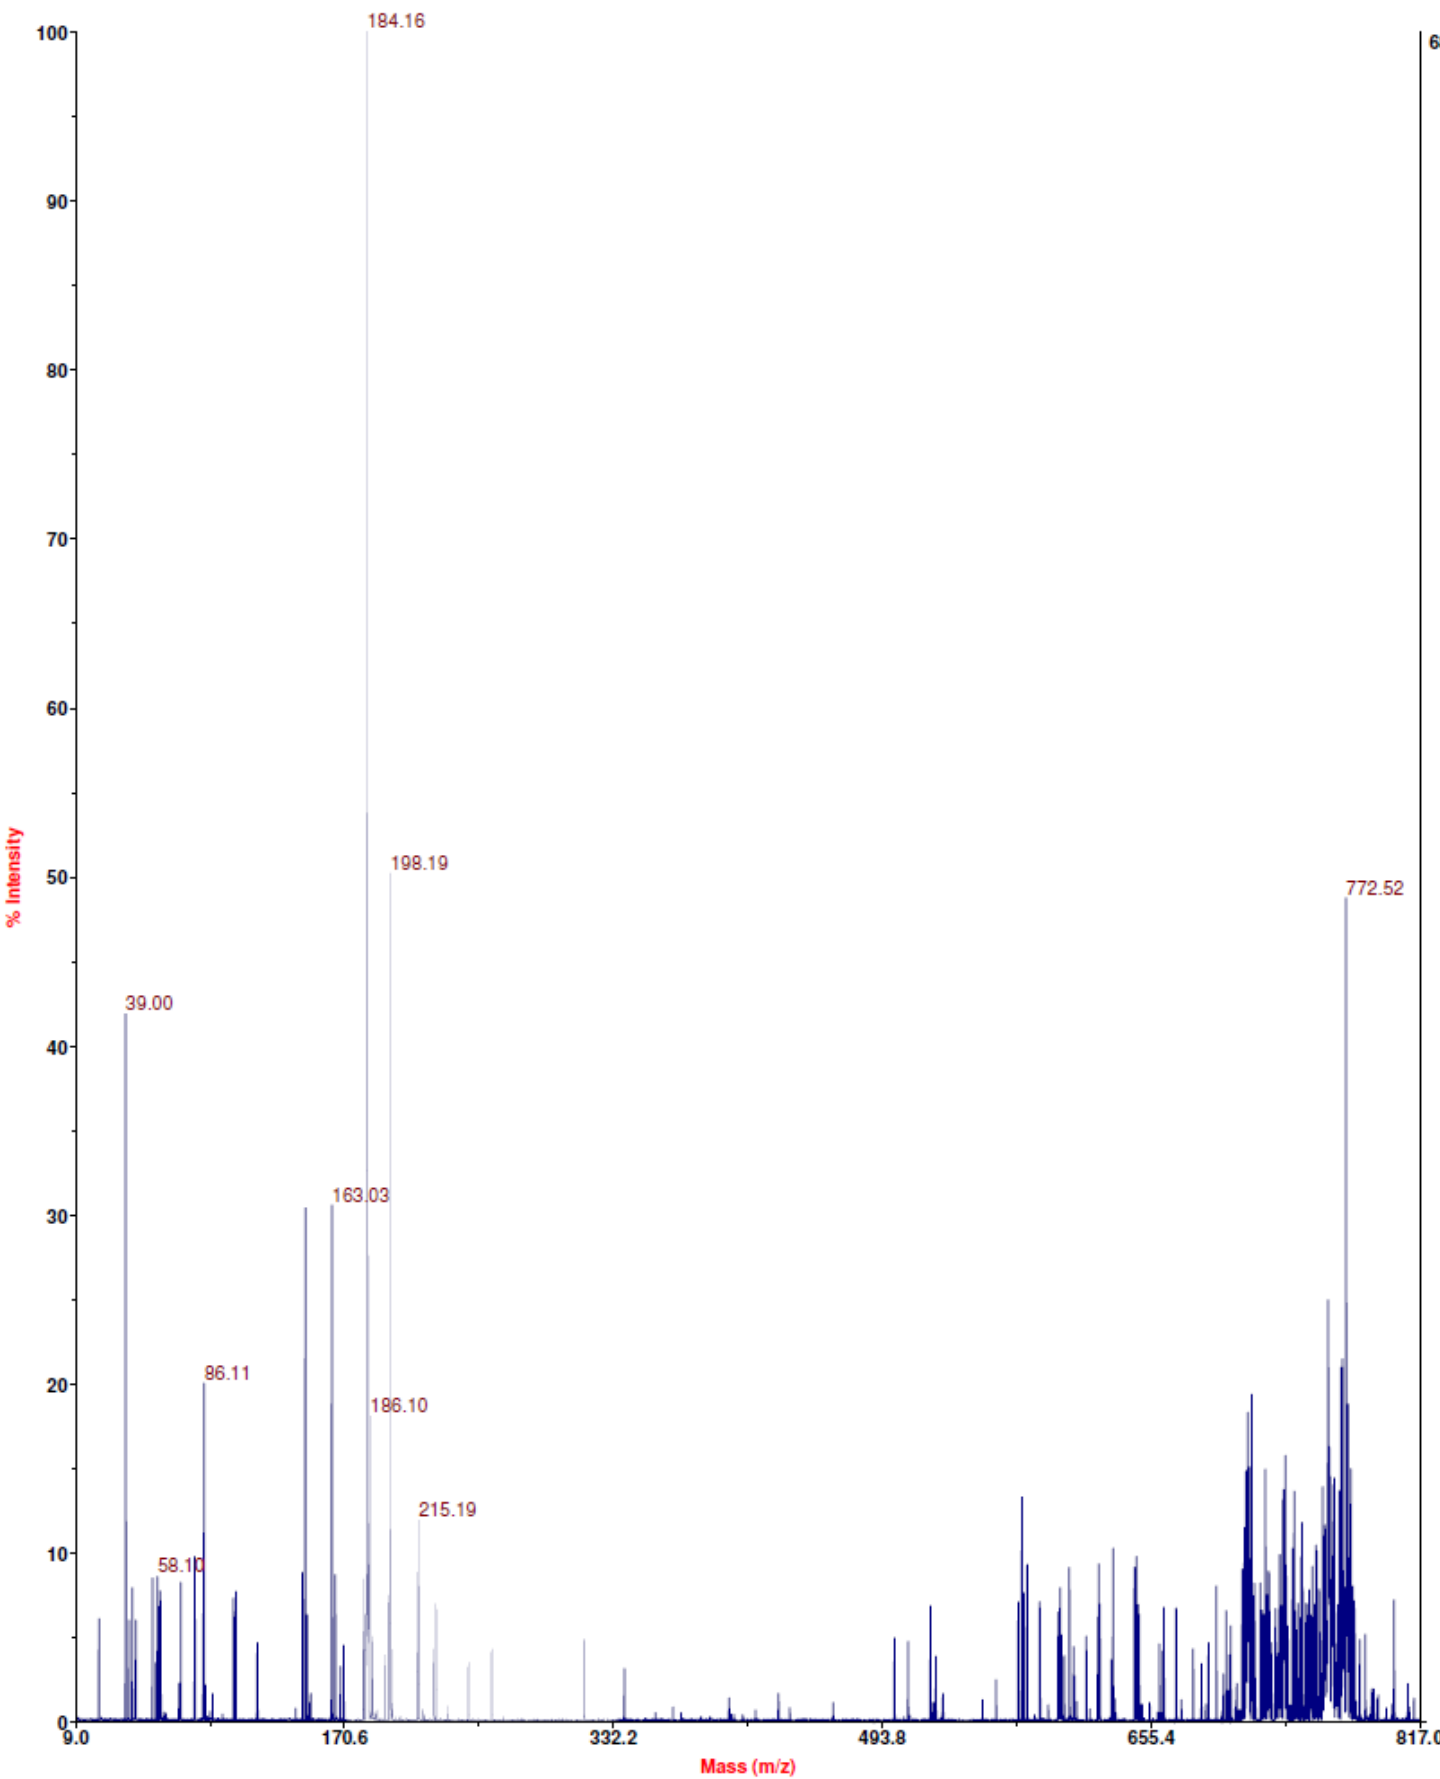

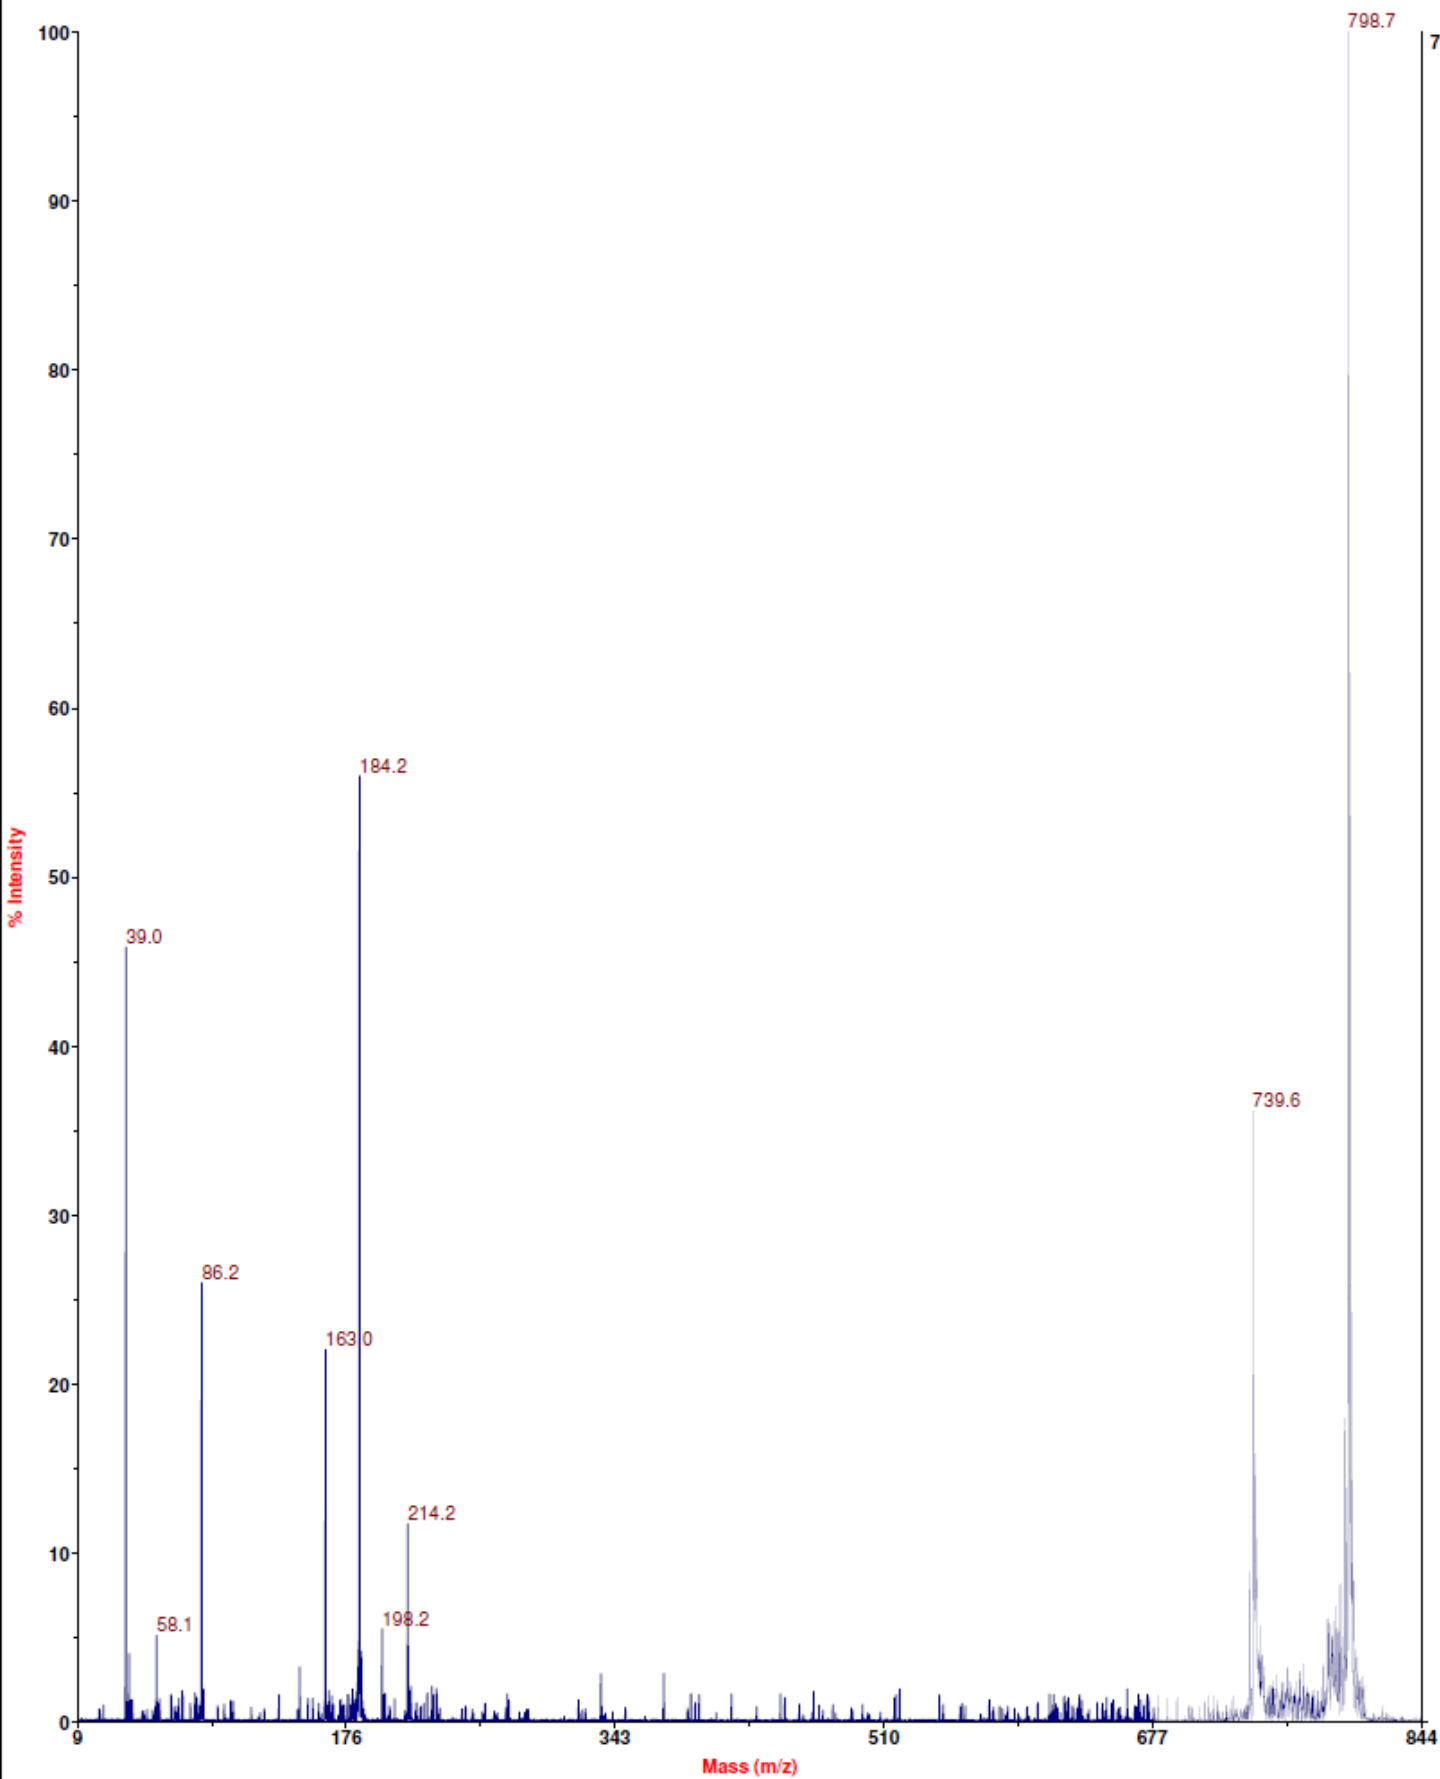

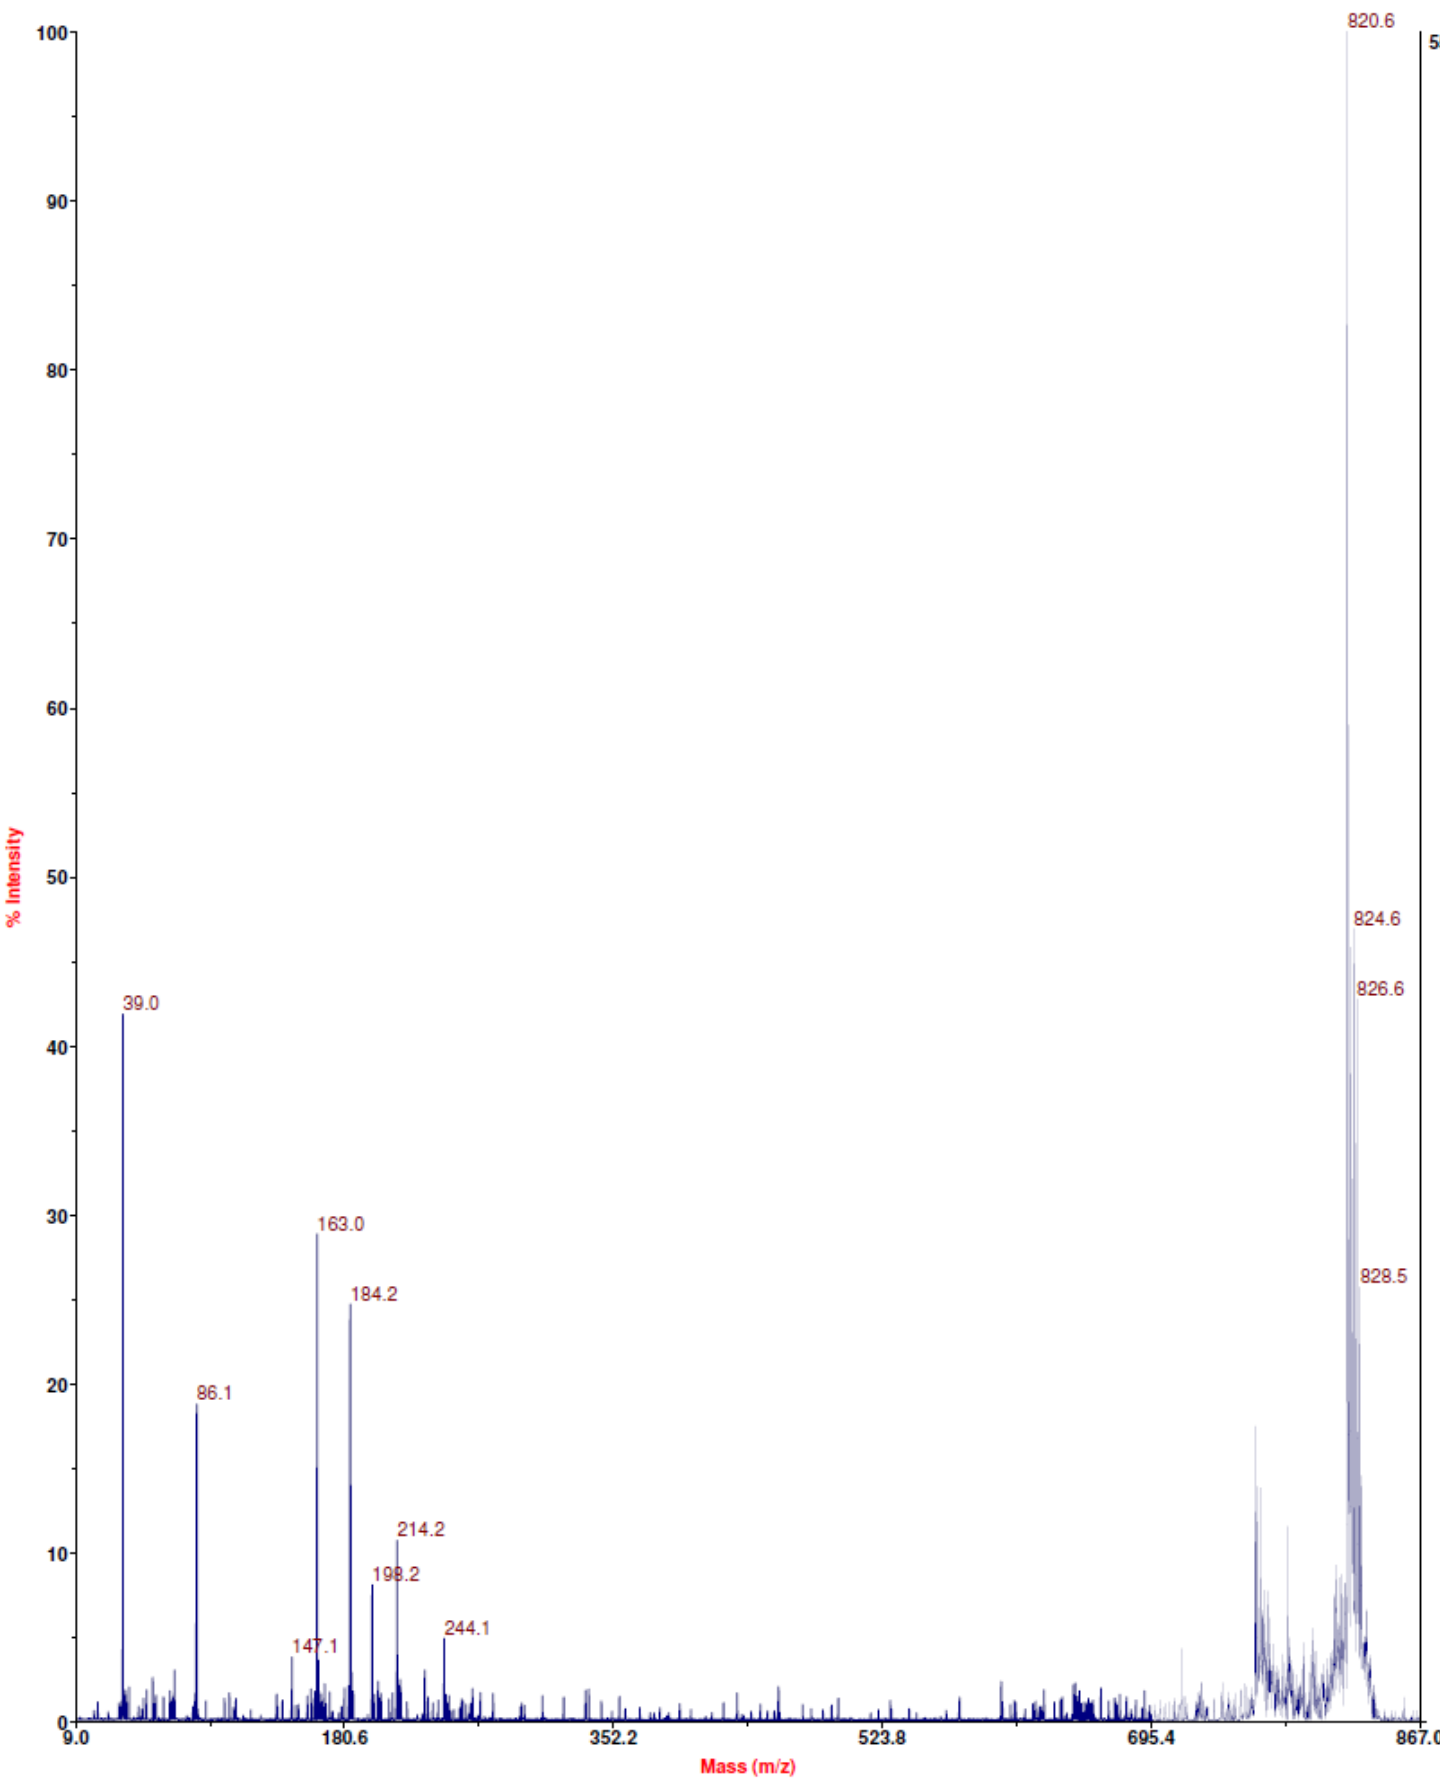

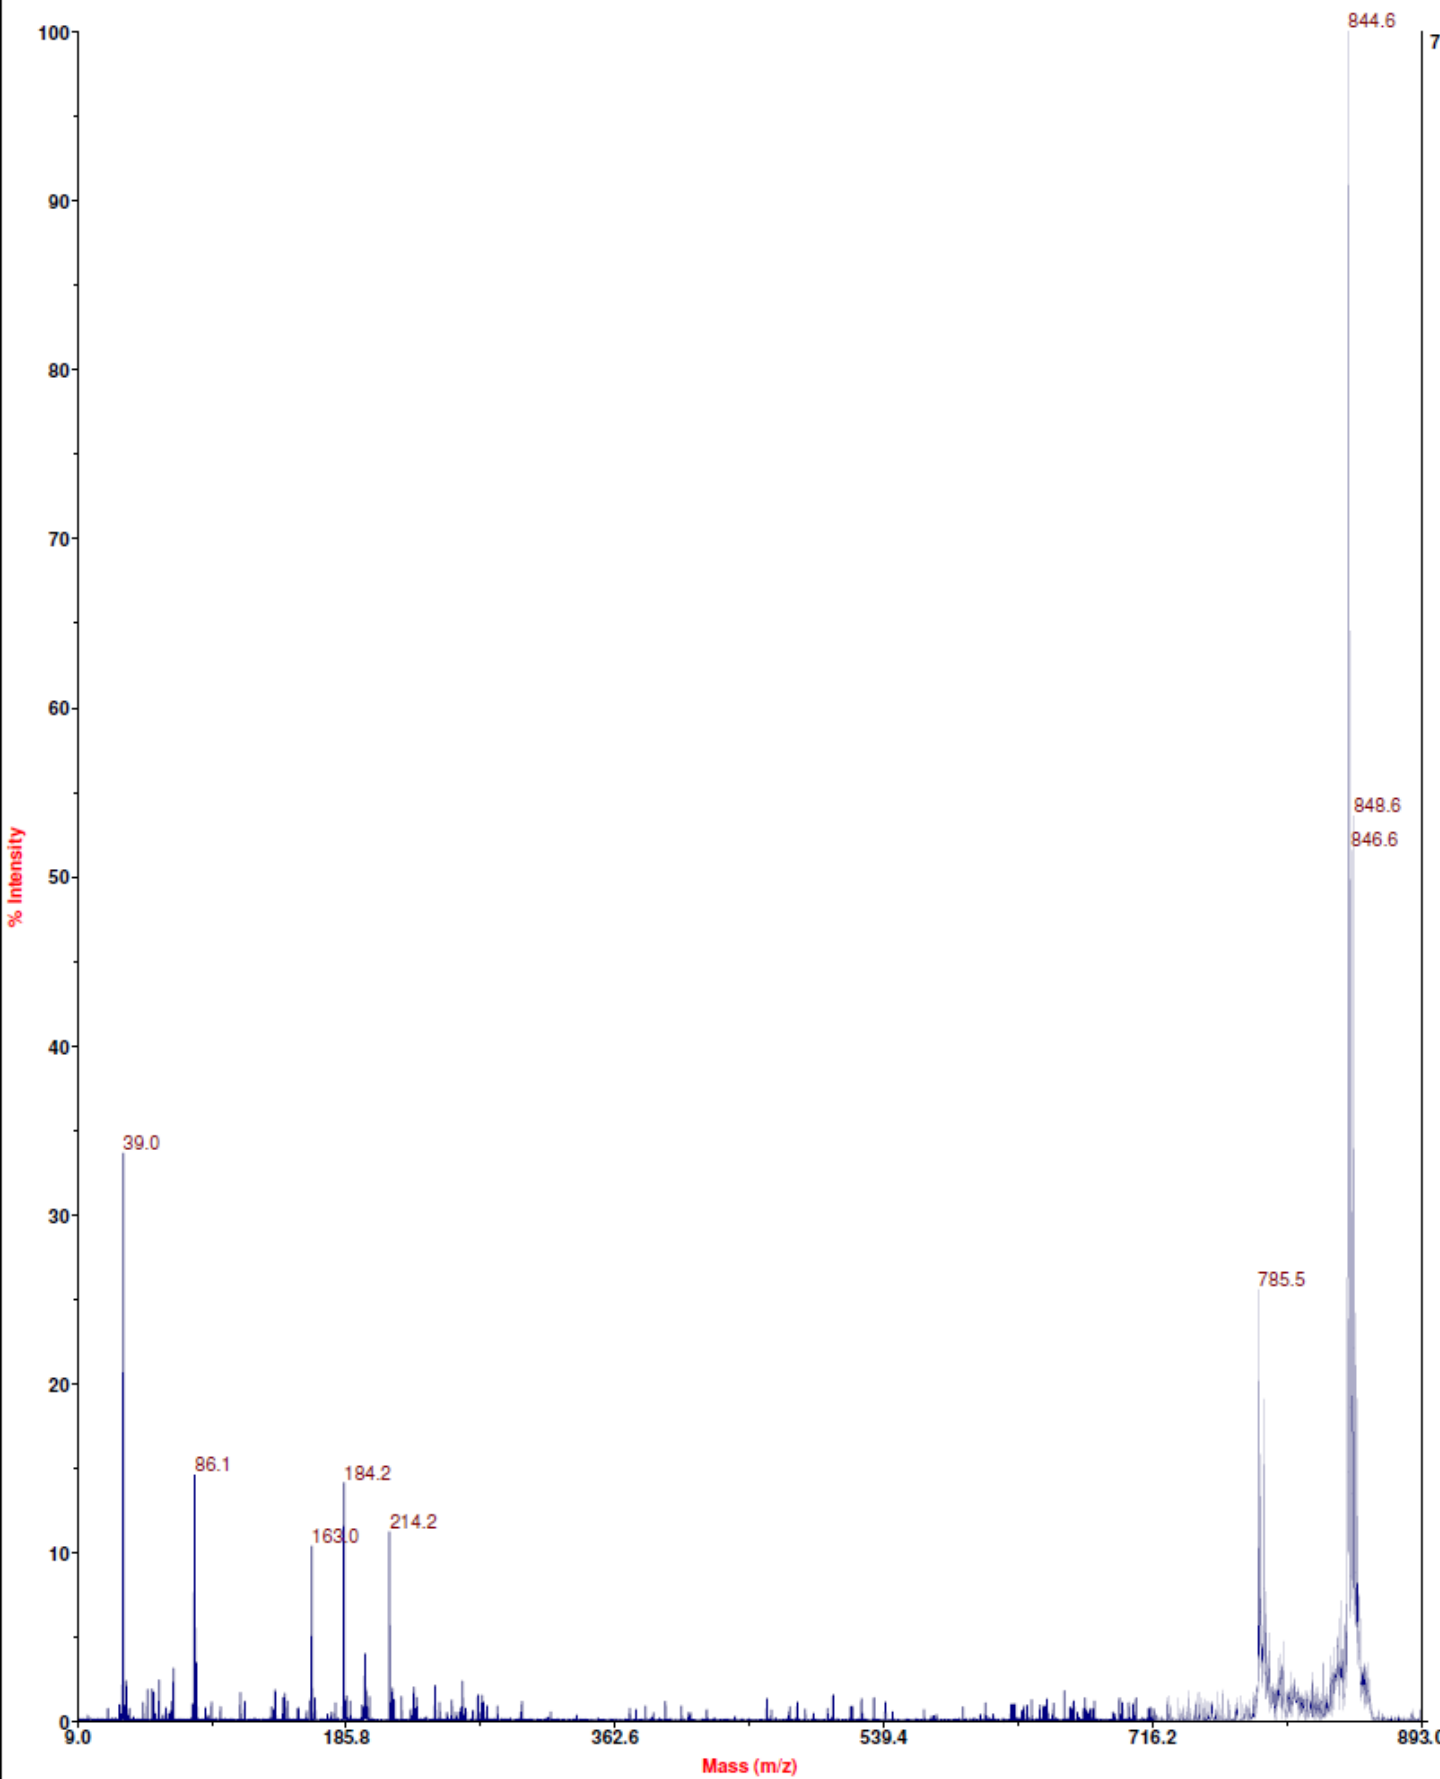

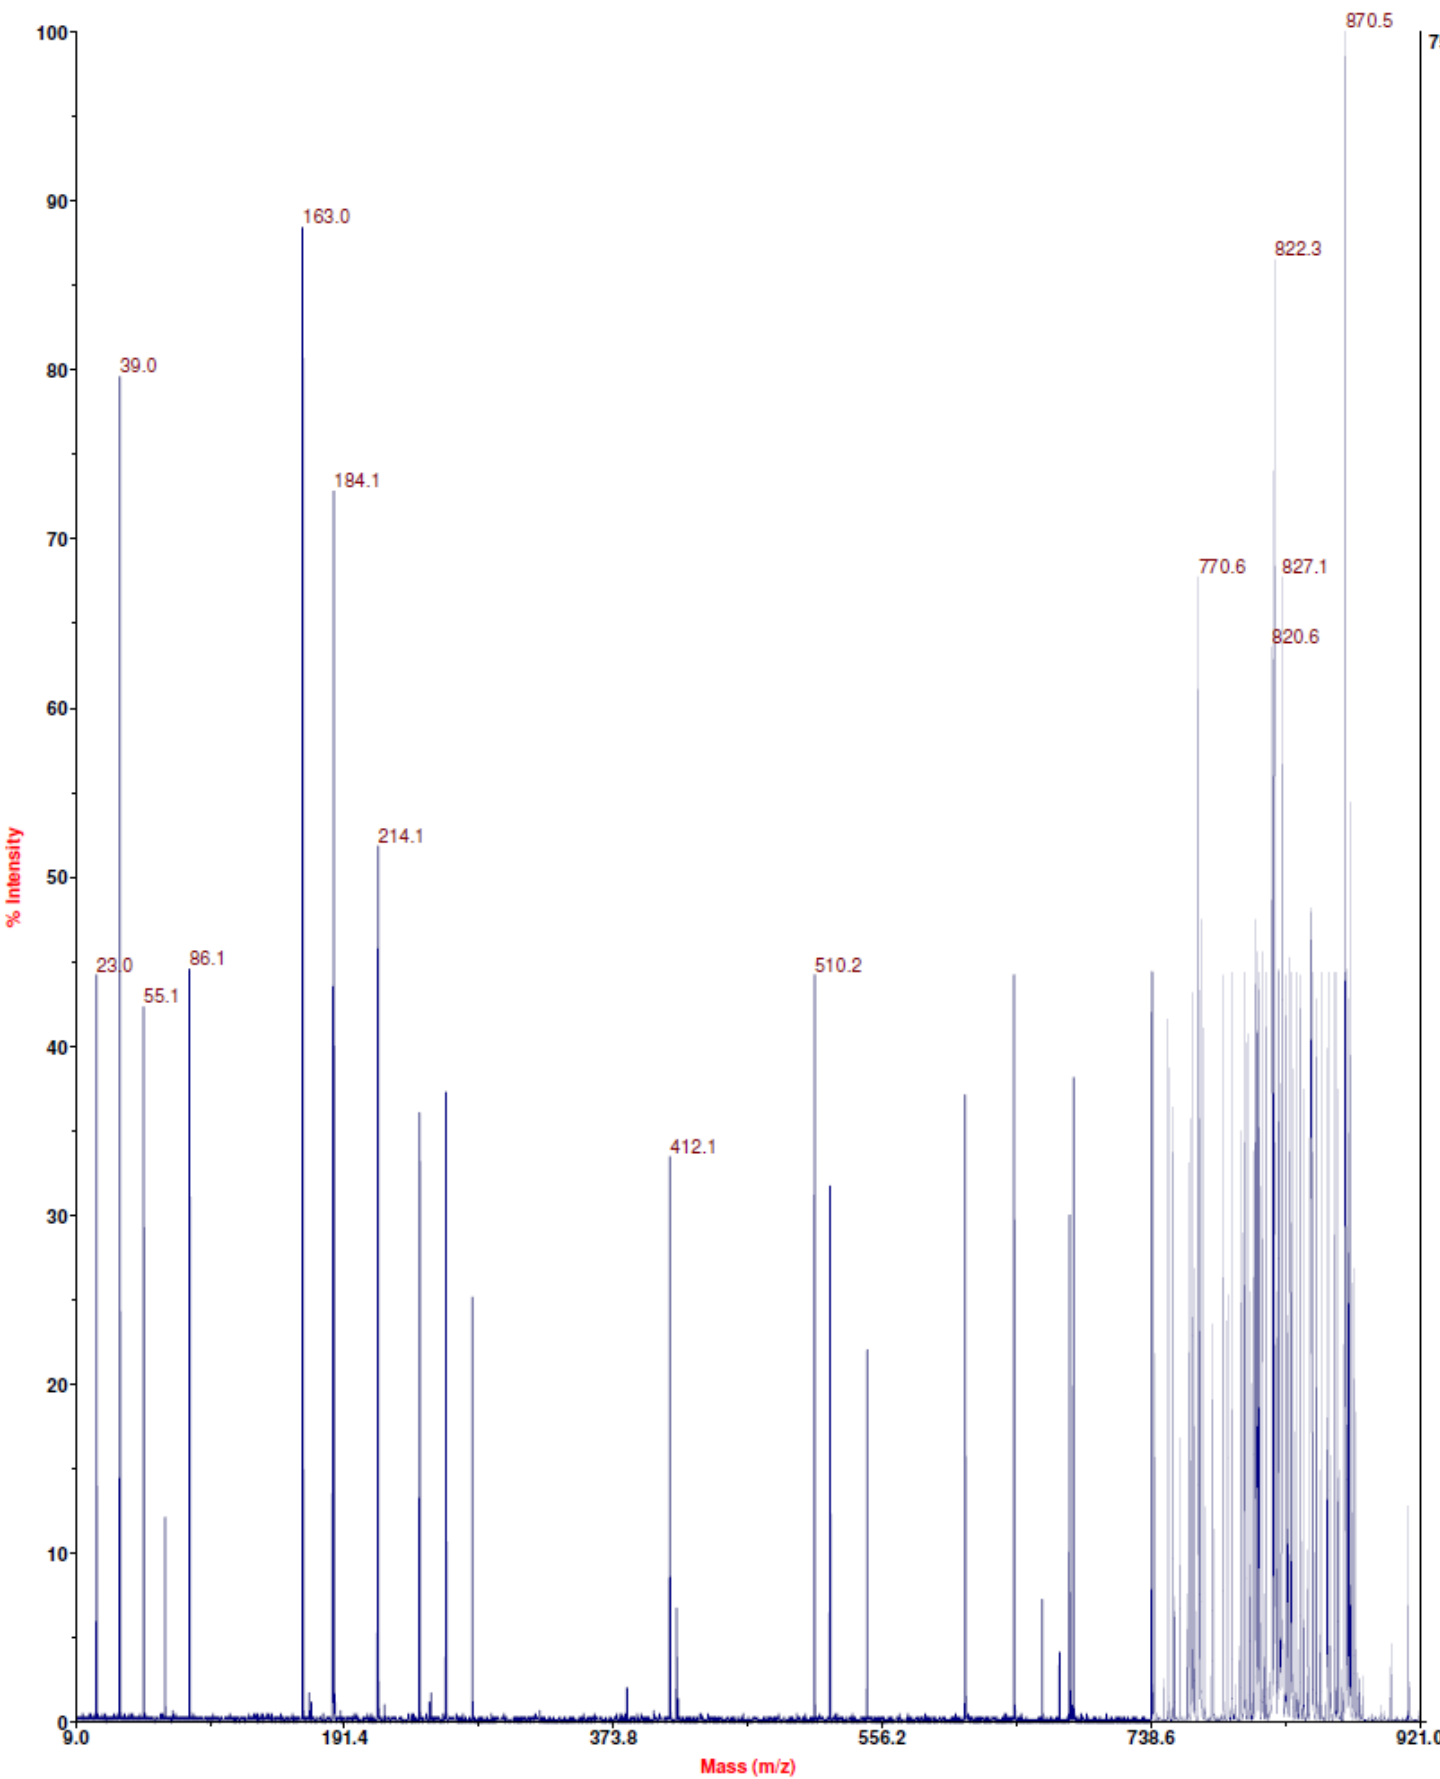

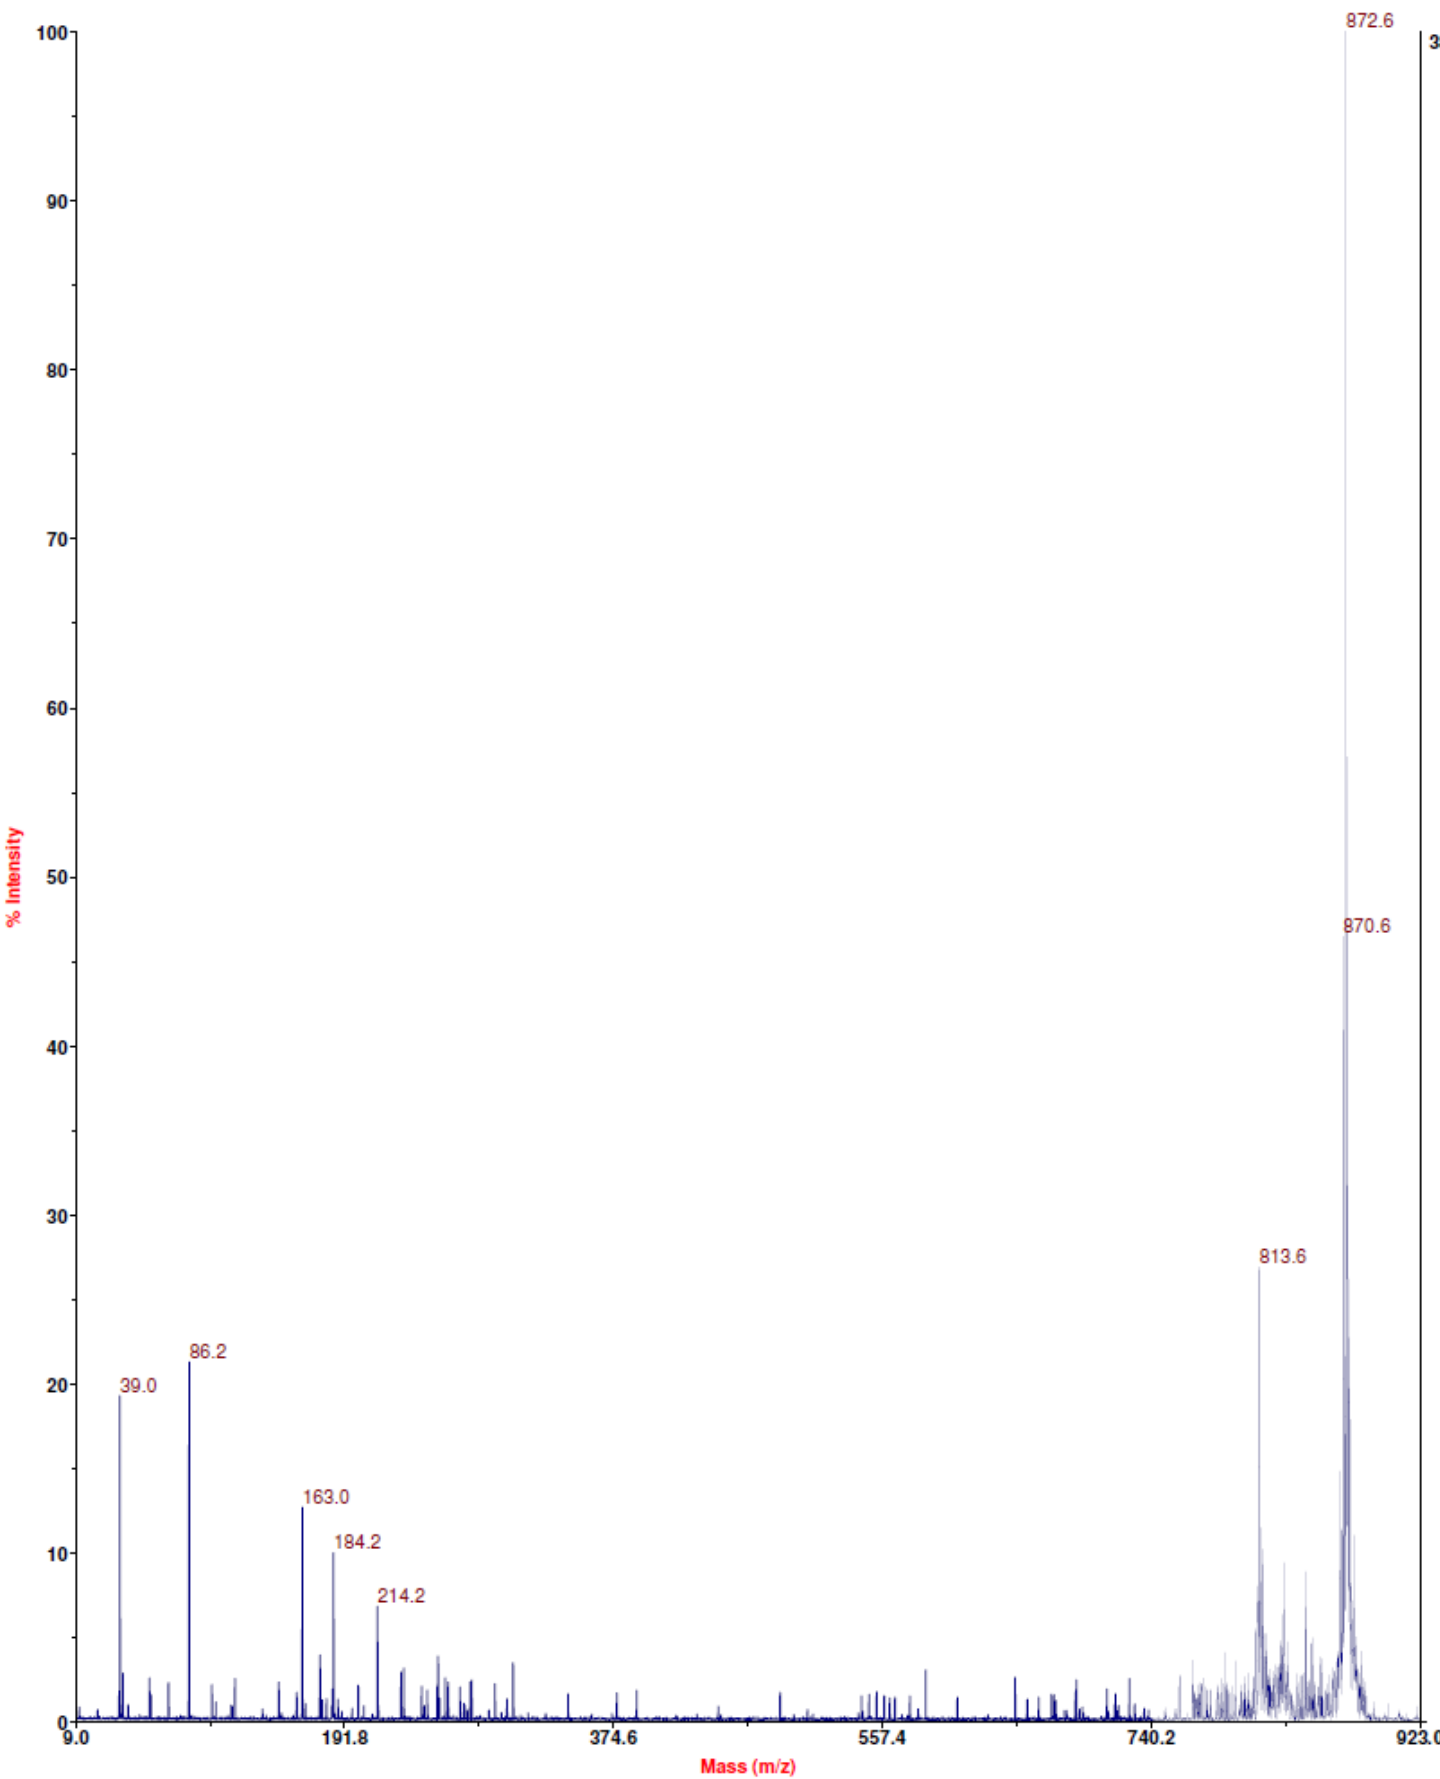

Supplement: c2ib20043k_2.pdf [file c2ib20043k_2.pdf]
